# Supplementary material for: Modelling and Classification of Apple Textural Attributes Using Sensory, Instrumental and Compositional Analyses
Source: PubMed Central journal article supplement (PMC7916372; doi:10.3390/foods10020384), 2021-02-10
Supplement: foods-10-00384-s001.pdf [file foods-10-00384-s001.pdf]

## Supplementary Material

**Table S1.** Macro for calculating six parameters on the force-distance curves, developed for the TA.XT*plus* Texture Analyzer using Exponent software (Stable Micro Systems Ltd., Godalming, Surrey, UK)

|     | Program                                      | Flags |
|-----|----------------------------------------------|-------|
| 1:  | Clear Graph Results                          |       |
| 2:  | Redraw                                       |       |
| 3:  | Search Forwards                              |       |
| 4:  | Go to Min. Time                              |       |
| 5:  | Drop Anchor                                  |       |
| 6:  | Go to 20 Percent of Max. Force               |       |
| 7:  | Drop Anchor                                  |       |
| 8:  | Go to 80 Percent of Max. Force               |       |
| 9:  | Drop Anchor                                  |       |
| 10: | Gradient (Active vs Active) as Grad (20-80%) | (R)   |
| 11: | Go to Absolute +ve Value Force Current Units |       |
| 12: | Drop Anchor                                  |       |
| 13: | Mark Value (Force (N)) as Fs                 | (R)   |
| 14: | Mark Value (Distance (mm)) as D              | (R)   |
| 15: | Select Anchor 1, Anchor Not Activated        | (F!)  |
| 16: | Area (Active vs Active) as Ws                | (R)   |
| 17: | Go to Distance 4.5 mm                        |       |
| 18: | Drop Anchor                                  |       |
| 19: | Go to Distance 9.5 mm                        |       |
| 20: | Drop Anchor                                  |       |
| 21: | Mean (Active) as Ff                          | (R)   |
| 22: | Area (Active vs Active) as Wf                | (R)   |

**Table S2.** Pearson correlation coefficients (*r*) and *p*-values calculated between mean sensory, instrumental <sup>a</sup> and compositional determinations (*n* = 72).

|                                                   |                 | <b>Crisp-<br/>ness</b> | <b>Hardness</b> | <b>Juiciness</b> | <b>Skin<br/>toughness</b> | <i>F<sub>s</sub></i> | <i>W<sub>s</sub></i> | <i>Grad</i>  | <i>D</i>     | <i>F<sub>f</sub></i> | <i>EJ</i>    | <i>TA</i>    |
|---------------------------------------------------|-----------------|------------------------|-----------------|------------------|---------------------------|----------------------|----------------------|--------------|--------------|----------------------|--------------|--------------|
| Hardness                                          | <i>r</i>        | <b>0.93</b>            |                 |                  |                           |                      |                      |              |              |                      |              |              |
|                                                   | <i>p</i> -value | <0.0001                |                 |                  |                           |                      |                      |              |              |                      |              |              |
| Juiciness                                         | <i>r</i>        | <b>0.61</b>            | <b>0.47</b>     |                  |                           |                      |                      |              |              |                      |              |              |
|                                                   | <i>p</i> -value | <0.0001                | <0.0001         |                  |                           |                      |                      |              |              |                      |              |              |
| Skin toughness                                    | <i>r</i>        | <b>-0.19</b>           | <b>-0.01</b>    | <b>-0.31</b>     |                           |                      |                      |              |              |                      |              |              |
|                                                   | <i>p</i> -value | 0.12                   | 0.93            | 0.01             |                           |                      |                      |              |              |                      |              |              |
| <i>F<sub>s</sub></i>                              | <i>r</i>        | <b>0.63</b>            | <b>0.77</b>     | <b>0.19</b>      | <b>0.33</b>               |                      |                      |              |              |                      |              |              |
|                                                   | <i>p</i> -value | <0.0001                | <0.0001         | 0.12             | <0.01                     |                      |                      |              |              |                      |              |              |
| <i>W<sub>s</sub></i>                              | <i>r</i>        | <b>0.00</b>            | <b>0.16</b>     | <b>-0.14</b>     | <b>0.63</b>               | <b>0.64</b>          |                      |              |              |                      |              |              |
|                                                   | <i>p</i> -value | 0.97                   | 0.18            | 0.25             | <0.0001                   | <0.0001              |                      |              |              |                      |              |              |
| <i>Grad</i>                                       | <i>r</i>        | <b>0.75</b>            | <b>0.80</b>     | <b>0.25</b>      | <b>-0.10</b>              | <b>0.78</b>          | <b>0.07</b>          |              |              |                      |              |              |
|                                                   | <i>p</i> -value | <0.0001                | <0.0001         | 0.03             | 0.41                      | <0.0001              | 0.56                 |              |              |                      |              |              |
| <i>D</i>                                          | <i>r</i>        | <b>-0.60</b>           | <b>-0.48</b>    | <b>-0.39</b>     | <b>0.53</b>               | <b>-0.07</b>         | <b>0.70</b>          | <b>-0.61</b> |              |                      |              |              |
|                                                   | <i>p</i> -value | <0.0001                | <0.0001         | <0.001           | <0.0001                   | 0.58                 | <0.0001              | <0.0001      |              |                      |              |              |
| <i>F<sub>f</sub></i>                              | <i>r</i>        | <b>0.83</b>            | <b>0.91</b>     | <b>0.40</b>      | <b>0.12</b>               | <b>0.88</b>          | <b>0.36</b>          | <b>0.80</b>  | <b>-0.31</b> |                      |              |              |
|                                                   | <i>p</i> -value | <0.0001                | <0.0001         | <0.001           | 0.34                      | <0.0001              | <0.01                | <0.0001      | 0.01         |                      |              |              |
| Expressed juiciness<br>( <i>EJ</i> )              | <i>r</i>        | <b>0.54</b>            | <b>0.42</b>     | <b>0.61</b>      | <b>-0.26</b>              | <b>0.13</b>          | <b>-0.18</b>         | <b>0.22</b>  | <b>-0.41</b> | <b>0.29</b>          |              |              |
|                                                   | <i>p</i> -value | <0.0001                | <0.001          | <0.0001          | 0.03                      | 0.29                 | 0.13                 | 0.06         | <0.001       | 0.01                 |              |              |
| Titratable acidity<br>( <i>TA</i> )               | <i>r</i>        | <b>-0.57</b>           | <b>-0.47</b>    | <b>-0.34</b>     | <b>0.41</b>               | <b>-0.11</b>         | <b>0.36</b>          | <b>-0.40</b> | <b>0.65</b>  | <b>-0.28</b>         | <b>-0.53</b> |              |
|                                                   | <i>p</i> -value | <0.0001                | <0.0001         | <0.01            | <0.001                    | 0.37                 | <0.01                | <0.001       | <0.0001      | 0.02                 | <0.0001      |              |
| Soluble solids con-<br>centrations ( <i>SSC</i> ) | <i>r</i>        | <b>0.20</b>            | <b>0.24</b>     | <b>0.08</b>      | <b>0.01</b>               | <b>0.38</b>          | <b>0.33</b>          | <b>0.23</b>  | <b>0.08</b>  | <b>0.32</b>          | <b>-0.23</b> | <b>-0.01</b> |
|                                                   | <i>p</i> -value | 0.10                   | 0.05            | 0.49             | 0.91                      | 0.001                | <0.01                | 0.05         | 0.52         | 0.01                 | 0.05         | 0.97         |

<sup>a</sup> determined using the TA.XTplus Texture Analyzer (Stable Micro Systems Ltd., Godalming, Surrey, UK) as described in Table 1.
